# Supplementary material for: Green synthesis of porous Au–Nx-TiO2 nanospheres for solar light induced photocatalytic degradation of diazo and triazo dyes and their eco-toxic effects
Source: Royal Society of Chemistry journal article supplement (doi:10.1039/c8nj04554b), 2018-01-01
Supplement: c8nj04554b1.pdf [file c8nj04554b1.pdf]

## Supporting information

### Green synthesis of porous Au-N<sub>x</sub>-TiO<sub>2</sub> nanospheres for solar light induced photocatalytic degradation of diazo, triazo dyes and their eco-toxic effects

N. Pugazhenthiran,<sup>1,2,\*</sup> R.V. Mangalaraja,<sup>1,3,\*\*</sup> P. Sathishkumar,<sup>4</sup> S. Murugesan,<sup>2</sup> T. Muneeswaran,<sup>5</sup>  
T. Pandiyarajan,<sup>1</sup> S. Naveenraj,<sup>1</sup> D. Contreras,<sup>6,7</sup> S. Anandan<sup>8</sup>

<sup>1</sup>Advanced Ceramics and Nanotechnology Laboratory, Department of Materials Engineering,  
Faculty of Engineering, University of Concepcion, Concepcion 4070409, Chile.

<sup>2</sup>School of Chemistry, Madurai Kamaraj University, Madurai-625021, India

<sup>3</sup>Technological Development Unit, University of Concepcion, Coronel Industrial Park, Coronel-4191996, Chile.

<sup>4</sup>Department of Physical Chemistry, Aksum University, Axum-1010, Ethiopia.

<sup>5</sup>Department of Marine & Coastal Studies, School of Energy, Environment and Natural Resources,  
Madurai Kamraj University, Madurai, 625021, Tamil Nadu, India.

<sup>6</sup>Department of Analytical and Inorganic Chemistry, Faculty of Chemical Sciences, <sup>7</sup>Center for Biotechnology,  
University of Concepcion, Concepcion 4070409, Chile.

<sup>8</sup>Nanomaterials & Solar Energy Conversion Lab, Department of Chemistry, National Institute of Technology,  
Tiruchirappalli 620015, India.

Corresponding Authors

\*The author (N.P): npugazhmku@gmail.com; Tel.: +56-412203664; Fax: +56-41-2203391.

\*\*The author (R.V.M): mangal@udec.cl; Tel.: +56-412207389; Fax: +56-41-2203391.

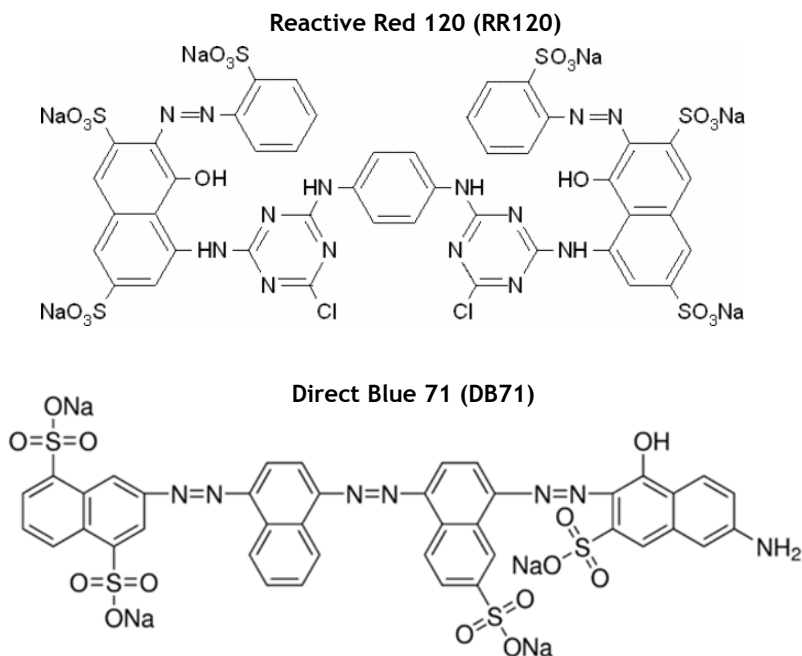

**Fig. S1.** The molecular structures for the model pollutants (diazo (RR120) and triazo dyes (DB71)).

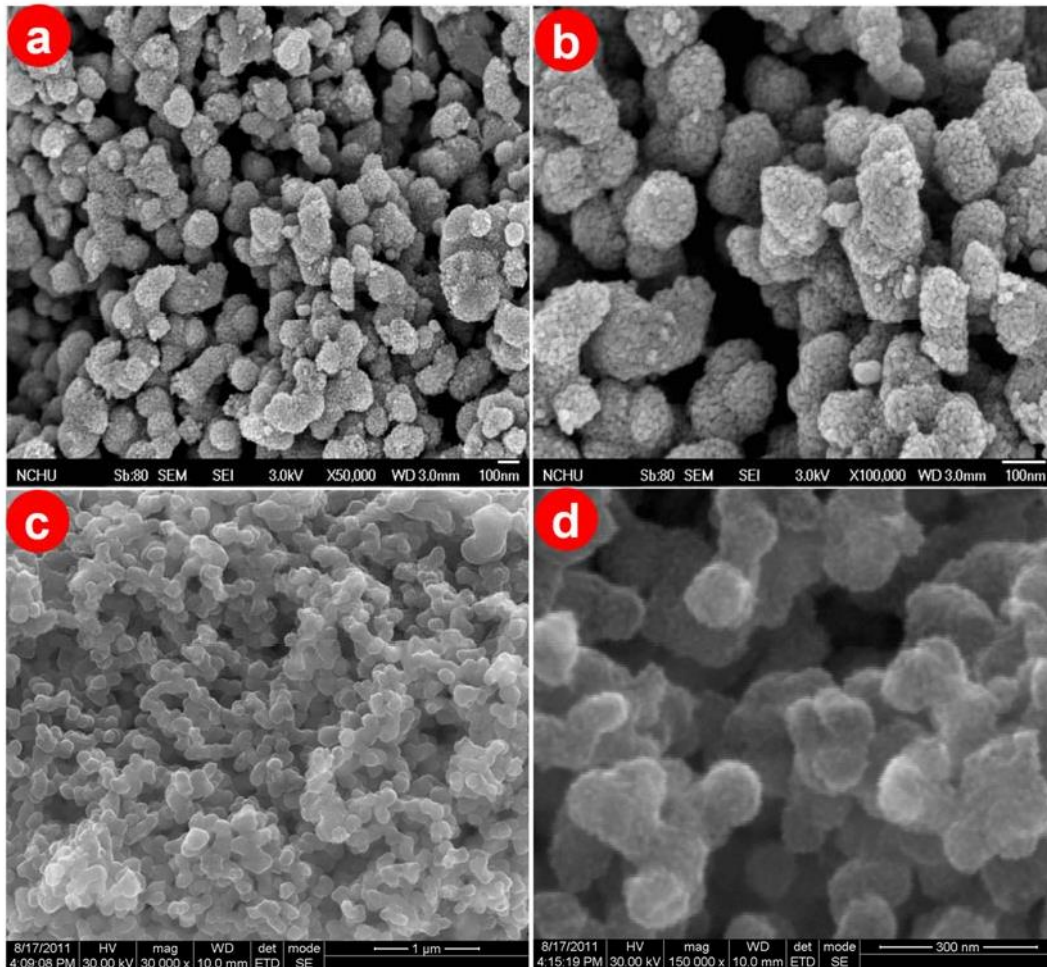

**Fig. S2.** SEM images of porous TiO<sub>2</sub> NSPs (a,b) and N<sub>x</sub>-TiO<sub>2</sub> NSPs (c,d).

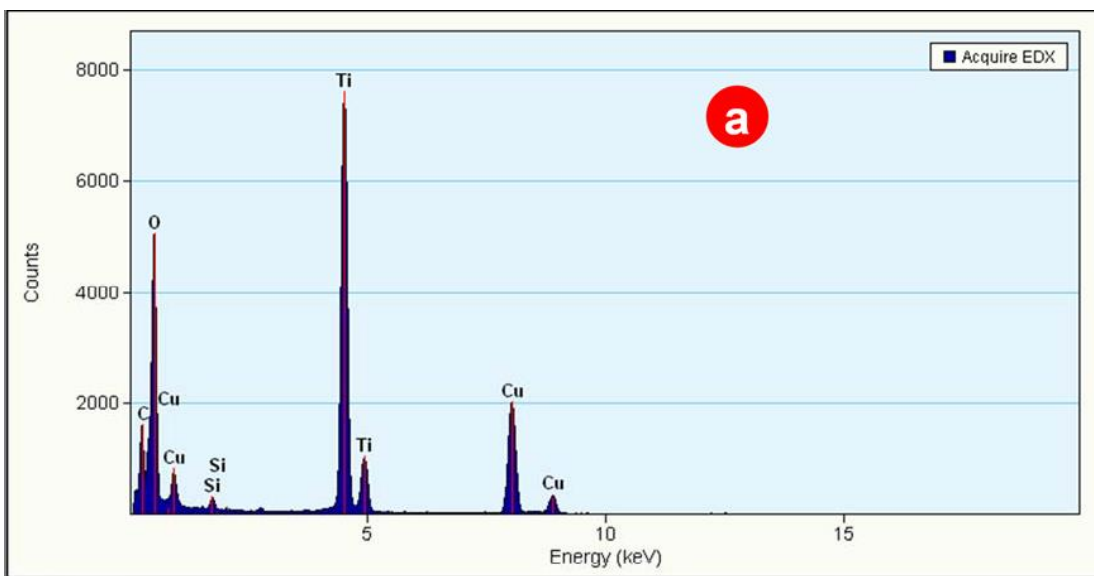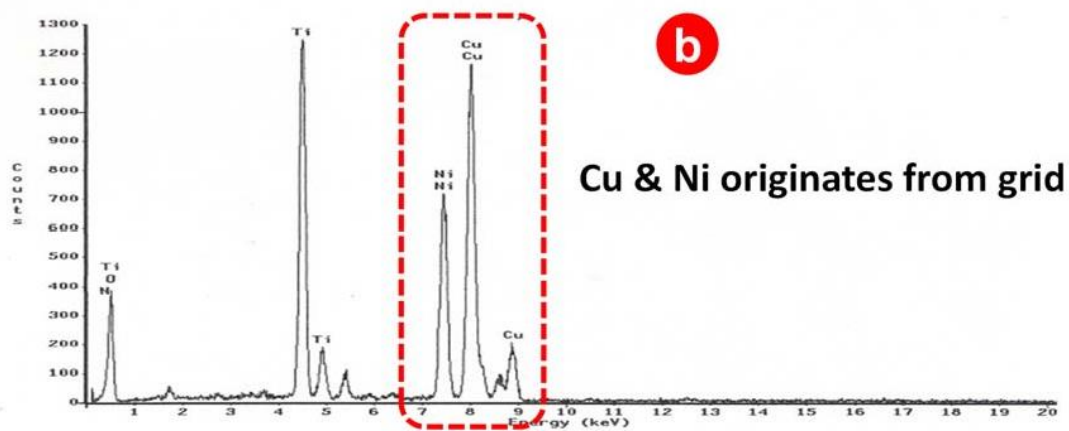

**Fig. S3.** EDAX spectra of porous TiO<sub>2</sub> NSPs (a) and N<sub>x</sub>-TiO<sub>2</sub> NSPs (b).

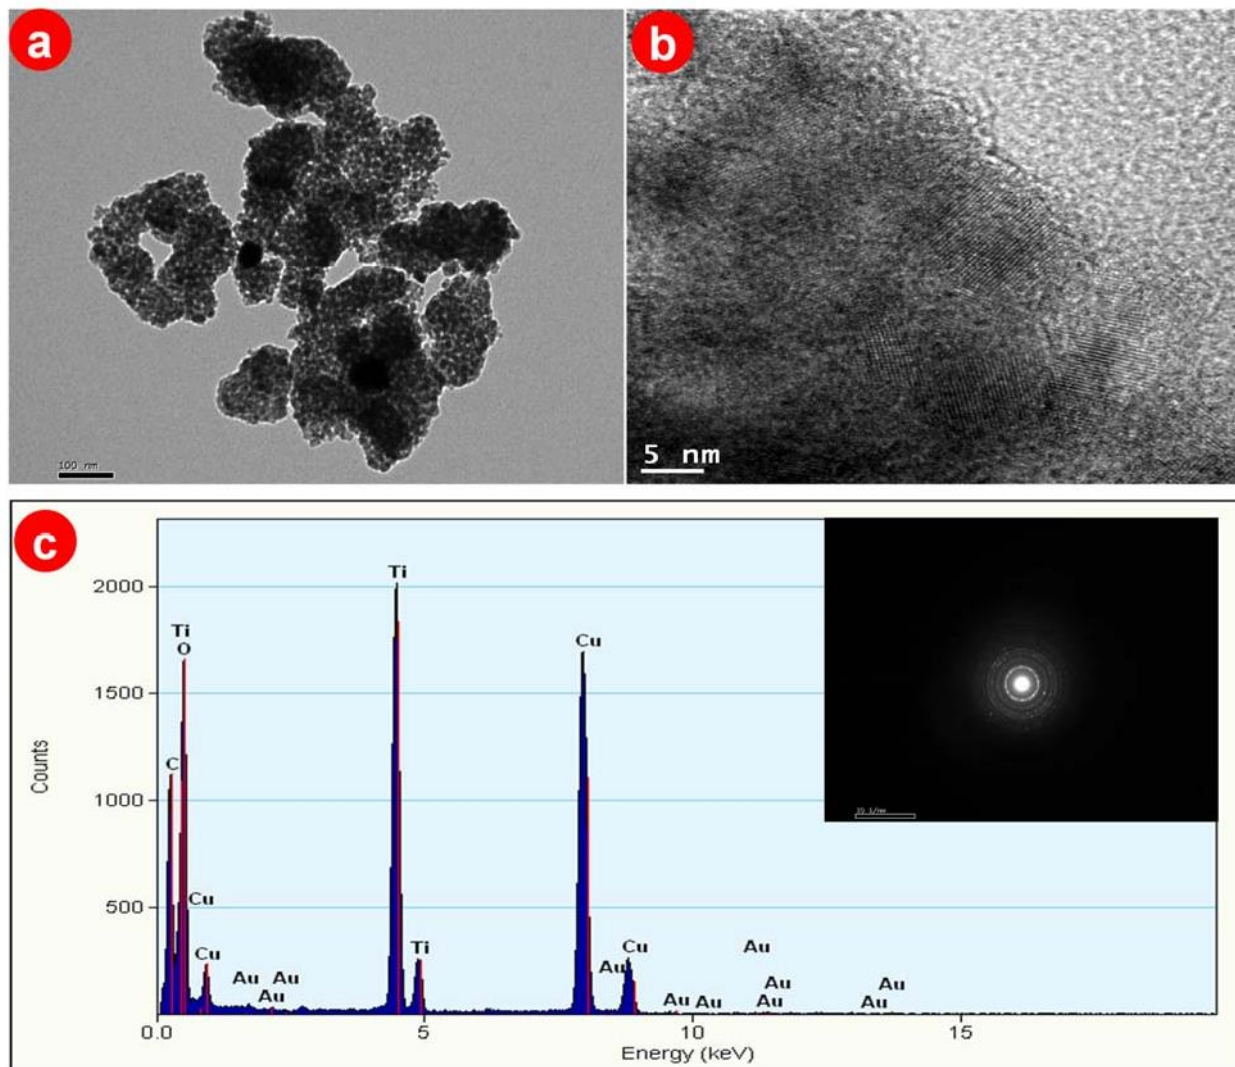

**Fig. S4.** TEM images (a), HRTEM image (b), EDAX spectrum (c) of porous Au-TiO<sub>2</sub> NSPs.

Inset (c): Corresponding SAED pattern.

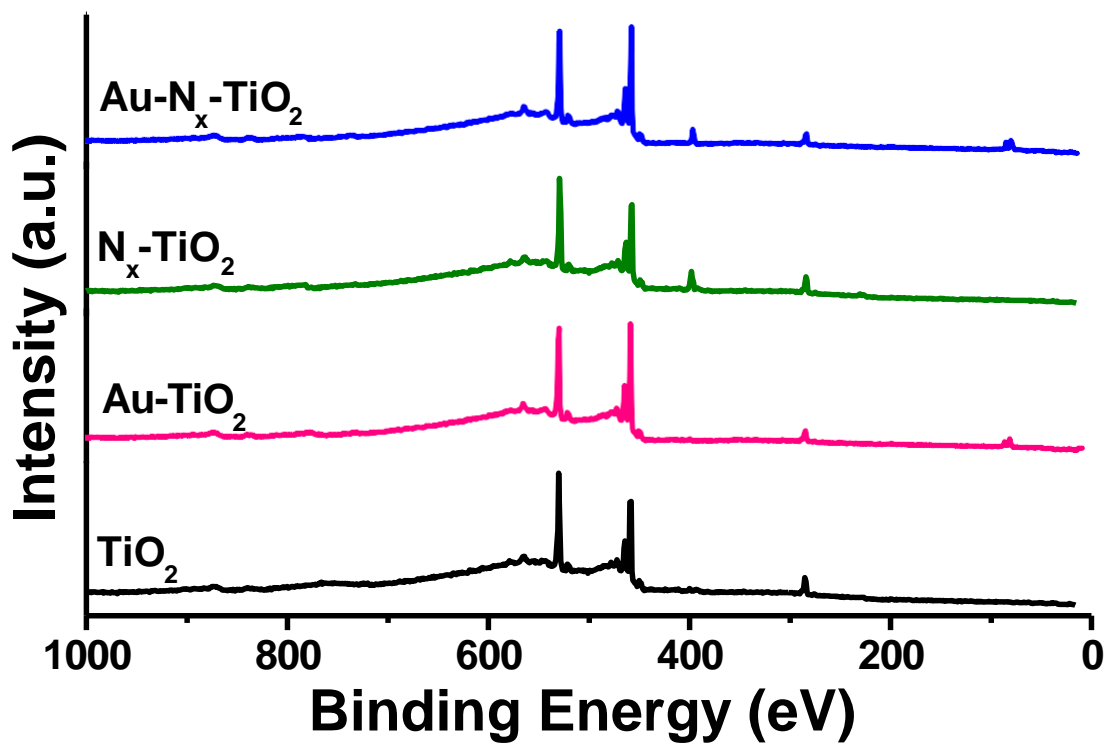

Fig. S5. XPS survey spectra of prepared photocatalysts.

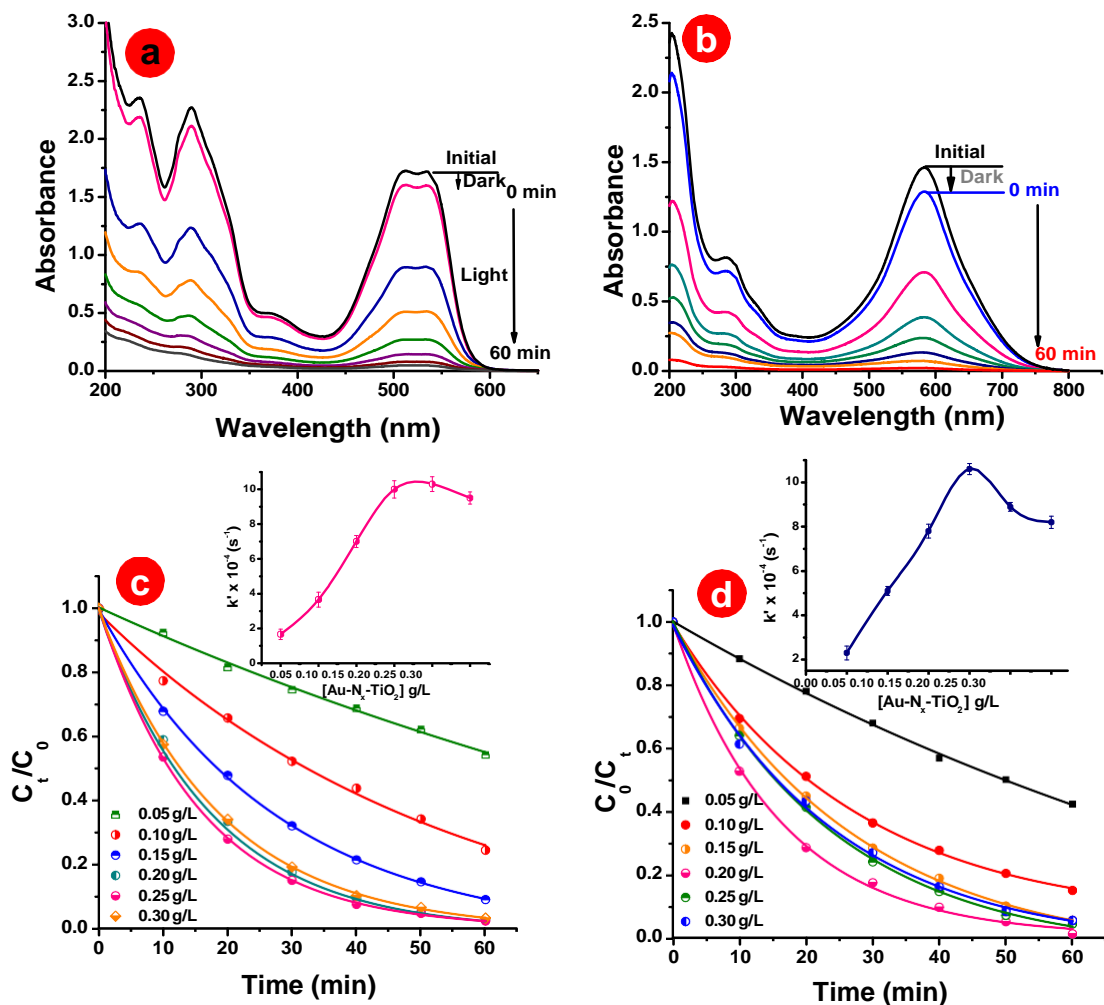

**Fig. S6.** UV-visible spectra of RR120 (a), DB71 (b) at different irradiation periods in the presence of porous Au-N<sub>x</sub>-TiO<sub>2</sub> NSPs. [Dyes] =  $4 \times 10^{-5}$  M and [Au-N<sub>x</sub>-TiO<sub>2</sub> NSPs] =  $0.2 \text{ g L}^{-1}$ . Plot of (C/C<sub>0</sub>) vs. time for the photocatalytic degradation of RR120 (c) and DB71 (d) at various concentration of porous Au-N<sub>x</sub>-TiO<sub>2</sub> NSPs [Dye] =  $4 \times 10^{-5}$  M. Inset: corresponding rate constant plot. Error bars are the standard deviations of triplicate experiments.

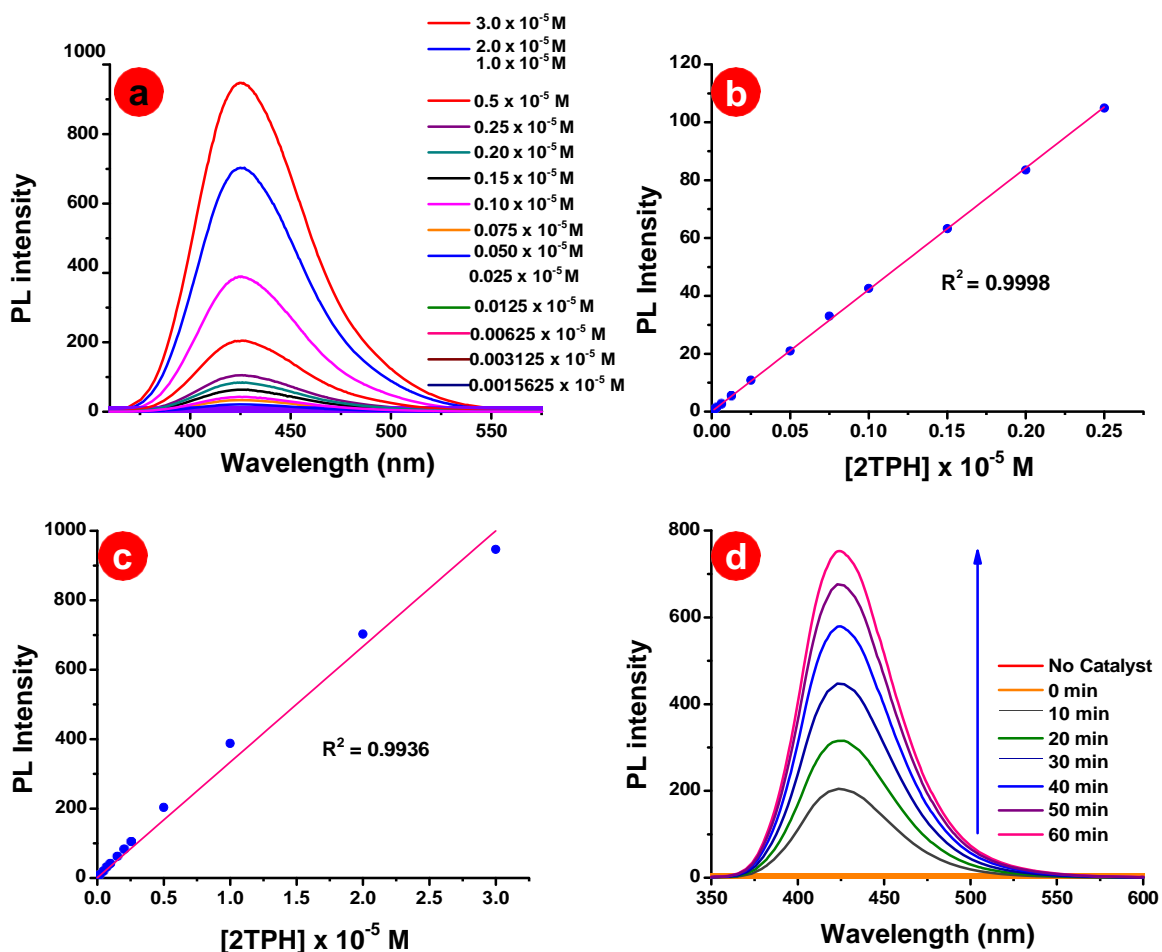

**Fig. S7.** PL spectra of 2-hydroxy terephthalic acid (standard) at various concentrations (a), fluorescence calibration curves as a function of 2-hydroxy terephthalic acid concentration (b,c), PL spectra of terephthalic acid at various irradiation times in the presence of porous  $Au-N_x-TiO_2$  NSPs (d). [Catalysts] =  $0.2 \text{ g L}^{-1}$ ; [TA] =  $5 \times 10^{-4}$  M.

**Table S8.** Summary of the results obtained for the amount of photocatalytic degradation of azo dyes and formation of HO• radical in the presence of various catalysts. (*The reaction parameters are identical in the dye degradation and HO• radical quantification*)

| Irradiation                              | Catalyst<br>(0.2 g L <sup>-1</sup> )                | Amount of HO•<br>radical formation<br>(10 <sup>-5</sup> M) | Amount of degradation (10 <sup>-5</sup> M) |                    |
|------------------------------------------|-----------------------------------------------------|------------------------------------------------------------|--------------------------------------------|--------------------|
|                                          |                                                     |                                                            | RR120                                      | DB71               |
| Direct Solar<br>light                    | TiO <sub>2</sub> (Degussa P25)                      | 0.33 ± 0.04                                                | 1.80 ± 0.05                                | 2.40 ± 0.02        |
|                                          | Porous TiO <sub>2</sub> NSPs                        | 0.47 ± 0.03                                                | 1.95 ± 0.05                                | 2.50 ± 0.01        |
|                                          | Porous N <sub>x</sub> -TiO <sub>2</sub> NSPs        | 0.89 ± 0.05                                                | 2.79 ± 0.13                                | 2.76 ± 0.08        |
|                                          | Porous Au-TiO <sub>2</sub> NSPs                     | 1.21 ± 0.03                                                | 3.36 ± 0.09                                | 3.44 ± 0.04        |
|                                          | <b>Porous Au-N<sub>x</sub>-TiO<sub>2</sub> NSPs</b> | <b>1.79 ± 0.05</b>                                         | <b>3.90 ± 0.08</b>                         | <b>3.94 ± 0.02</b> |
| Solar<br>(visible) light<br>(λ > 395 nm) | TiO <sub>2</sub> (Degussa P25)                      | 0.05 ± 0.01                                                | 0.40 ± 0.03                                | 0.46 ± 0.01        |
|                                          | Porous TiO <sub>2</sub> NSPs                        | 0.07 ± 0.01                                                | 0.44 ± 0.02                                | 0.48 ± 0.02        |
|                                          | Porous N <sub>x</sub> -TiO <sub>2</sub> NSPs        | 0.44 ± 0.02                                                | 1.04 ± 0.06                                | 1.38 ± 0.04        |
|                                          | Porous Au-TiO <sub>2</sub> NSPs                     | 0.66 ± 0.02                                                | 1.30 ± 0.03                                | 1.70 ± 0.06        |
|                                          | <b>Porous Au-N<sub>x</sub>-TiO<sub>2</sub> NSPs</b> | <b>1.32 ± 0.01</b>                                         | <b>3.32 ± 0.05</b>                         | <b>3.52 ± 0.02</b> |



**S9:** The principle involved in the photocatalytic degradation is the formation of HO• radicals by the utilization of the photocatalytically generated excitons. In this context, the photocatalytically generated HO• radicals in the presence of Au-N<sub>x</sub>-TiO<sub>2</sub> NSPs on the direct solar light irradiation is identified and quantified through the photoluminescence (PL) technique. Terephthalic acid (TA) was used as the probe molecule and a change in the PL intensity of the photocatalytically formed 2-hydroxyterephthalic acid is directly proportional to the amount of the HO• produced during the photocatalytic reaction. The qualitative identification of the HO• radicals during the photocatalytic degradation reaction has been reported elsewhere<sup>1-4</sup>. It is important to quantify the photocatalytically generated HO• radicals. The experiments are carried out carefully to make a calibration curve using 2-hydroxyterephthalic acid as shown in **Fig. S7a-c**. The linear regression ( $R^2 = 0.9998$ ) of the calibration curve clearly indicated that the PL intensity of the 2-hydroxy terephthalic acid is increased with respect to its concentration upto  $0.25 \times 10^{-5}$  M (**Fig. S7b**) but the linear regression ( $R^2 = 0.9936$ ) slightly deviates at high concentration of 2-hydroxy terephthalic acid (**Fig. S7c**) which may be caused by 2-hydroxy terephthalic acid absorption and/or fluorescence quenching<sup>5</sup>. **Fig. S7d** reveals that there is no remarkable change in the PL intensity ( $\lambda_{\text{max}} = 425$  nm) of aqueous TA in the presence of the catalyst under dark as well as light irradiation in the absence of the porous Au-N<sub>x</sub>-TiO<sub>2</sub> NSPs. Whereas, the PL intensity of TA is increased in the presence of both solar light irradiation and porous Au-N<sub>x</sub>-TiO<sub>2</sub> NSPs in the photocatalytic system due to the formation of 2-hydroxy terephthalic acid through the reaction between TA and the photocatalytically generated hydroxyl radicals (HO•).

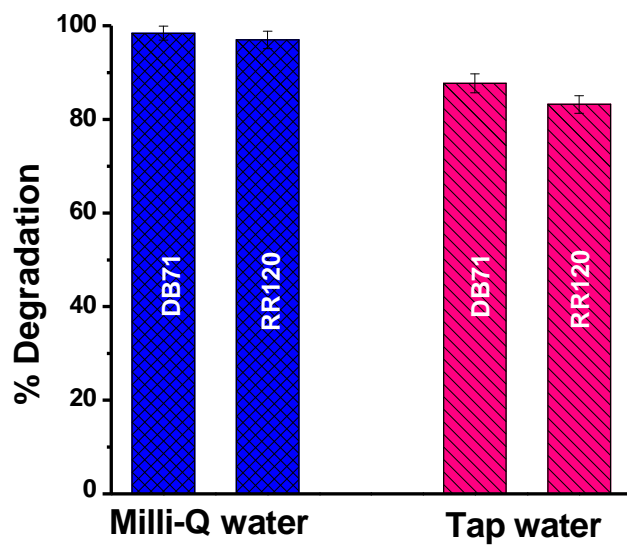

**Fig. S10.** Histograms showing the percentage degradation of dyes in the presence of Au-N<sub>x</sub>-TiO<sub>2</sub> NSPs under direct solar light irradiation. The experiments carried out in the both Milli-Q and tap water and concentrations are maintained as follows: [Catalyst] = 0.2 g L<sup>-1</sup>; [dye] = 4 × 10<sup>-5</sup> M.

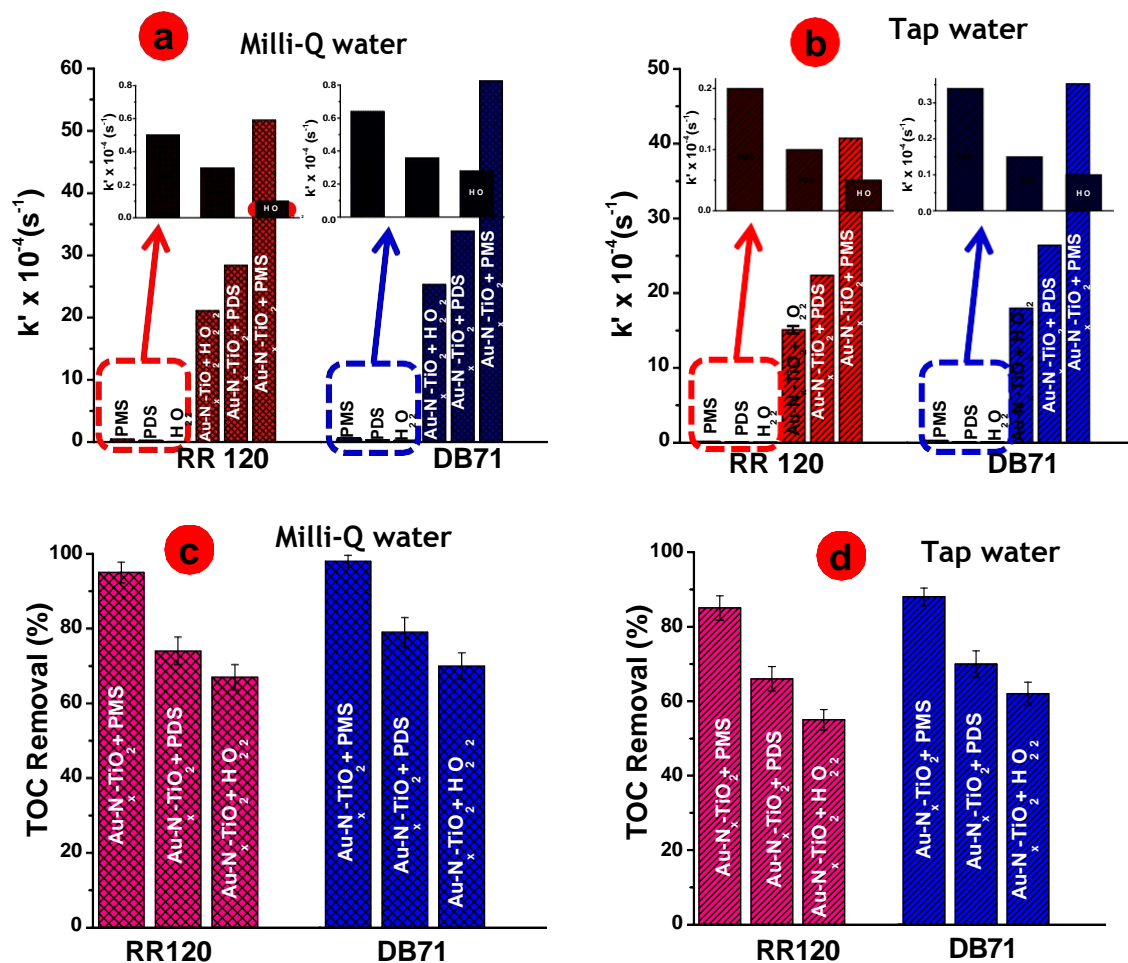

**Fig. S11.** Histograms showing the comparison of the photocatalytic degradation rate constant (a, b) and mineralization (c,d) of RR120 and DB71 in the presence of oxidants with and without porous Au-N<sub>x</sub>-TiO<sub>2</sub> NSPs under direct solar light irradiation. Inset (a,b): maximized area of corresponding plots. The experiments carried out in the both Milli-Q and tap water and concentrations are maintained as follows: [Catalyst] = 0.2 g L<sup>-1</sup>; [dye] = 4 × 10<sup>-5</sup> M and [Oxidants] = 2.5 × 10<sup>-4</sup> M.

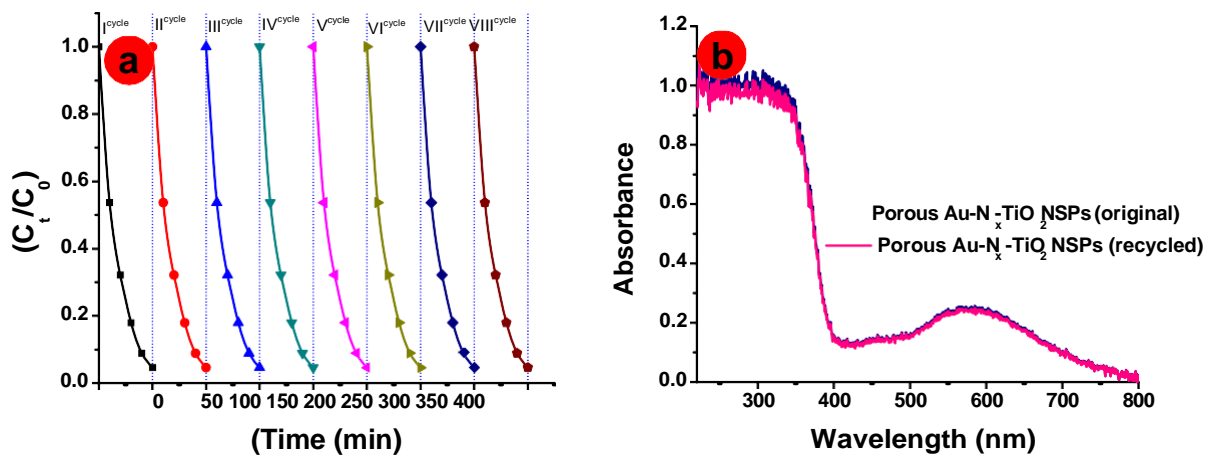

**Fig. S12.** Photocatalytic degradation of DB71 using recycled porous  $\text{Au-N}_x\text{-TiO}_2$  NSPs (a). Initial concentrations:  $[\text{Catalyst}] = 0.2 \text{ g L}^{-1}$ ;  $[\text{dye}] = 4 \times 10^{-5} \text{ M}$ . DRS of porous  $\text{Au-N}_x\text{-TiO}_2$  NSPs before and recycled (b).

## References

1. K.-i. Ishibashi, A. Fujishima, T. Watanabe and K. Hashimoto, *Electrochemistry Communications*, 2000, 2, 207-210.
2. B. Ahmmad, Y. Kusumoto and M. S. Islam, *Advanced Powder Technology*, 2010, 21, 292-297.
3. N. Pugazhenthiran, S. Murugesan and S. Anandan, *Journal of Hazardous Materials*, 2013, 263, Part 2, 541-549.
4. N. Pugazhenthiran, S. Murugesan, P. Sathishkumar and S. Anandan, *Chemical Engineering Journal*, 2014, 241, 401-409.
5. K. R. Millington and L. J. Kirschenbaum, *Coloration Technology*, 2002, 118, 6-14.
